# Supplementary material for: Ancient proteins from ceramic vessels at Çatalhöyük West reveal the hidden cuisine of early farmers
Source: PubMed Central journal article supplement (PMC6170438; doi:10.1038/s41467-018-06335-6), 2018-10-03
Supplement: 41467_2018_6335_MOESM3_ESM.pdf [file 41467_2018_6335_MOESM3_ESM.pdf]

## Description of Additional Supplementary Files

**File Name:** Supplementary Data 1

**Description:** Sample metadata, including archaeological context information, key features of ceramic samples and ProteomeXchange metadata

**File Name:** Supplementary Data 2

**Description:** Dietary protein and peptide identifications

**File Name:** Supplementary Data 3

**Description:** All identified peptides, with “OXF” indicating results from Protein Analysis #1 and “CPN” indicating results from Protein Analysis 2

**File Name:** Supplementary Data 4

**Description:** Summary of Zooarchaeology by Mass Spectrometry (ZooMS) data from Çatalhöyük West
